# Supplementary material for: The Financial Implications of Pancreatic Surgery: The Hospital Is the Big Winner, Not the Surgeon!
Source: PubMed Central journal article supplement — Ann Surg Open. 2023 Dec 21;5(1):e362. doi: 10.1097/AS9.0000000000000362 (PMC11175966; doi:10.1097/as9.0000000000000362), 2023-12-21
Supplement: as9-5-e362-s001.pdf [file as9-5-e362-s001.pdf]

Supplemental table 1. Perioperative characteristics of the entire patient cohort

| Characteristic (N=159)                          | Number of Patients (%) |
|-------------------------------------------------|------------------------|
| Final pathologic diagnosis                      |                        |
| Adenocarcinoma                                  | 97 (61)                |
| IPMN                                            | 23 (14)                |
| NET                                             | 10 (6)                 |
| Other                                           | 29 (18)                |
| New onset or worsening diabetes                 | 19 (12)                |
| Jaundice                                        | 51 (32)                |
| Bilirubin (median, IQR)                         | 0.6 mg/dL(0.6)         |
| Albumin (median, IQR)                           | 4.1 g/dL(0.7)          |
| Tumor size (median, IQR)                        | 2.8 cm (1.65)          |
| Preop biliary stenting                          | 65 (41)                |
| Preop EUS intervention                          | 109 (67)               |
| Neoadjuvant Chemotherapy                        | 28 (18)                |
| Surgery                                         |                        |
| Whipple                                         | 110 (69)               |
| Total Pancreatectomy                            | 10 (6)                 |
| Distal Pancreatectomy                           | 32 (20)                |
| Other                                           | 7 (4)                  |
| Length of surgery (median, IQR)                 | 425 min (104)          |
| ASA                                             |                        |
| II                                              | 24 (15)                |
| III                                             | 132 (83)               |
| IV                                              | 3 (2)                  |
| Length of postop hospital stay (median, IQR)    | 5 days (1)             |
| Complications (45 days postoperative)           |                        |
| Severe complications (Clavien-Dindo $\geq$ III) | 27 (17)                |
| IIIa                                            | 19 (12)                |
| IIIb                                            | 5 (3)                  |
| IVa                                             | 2 (1)                  |
| V                                               | 1 (1)                  |

|                             |         |
|-----------------------------|---------|
| Re-Admission within 30 days | 28 (18) |
| Re-Operation                | 1 (1)   |
| IR intervention             | 24 (15) |
| GI intervention             | 4 (2)   |
| Abscess                     | 23 (14) |
| DGE, GOO, Ileus             | 27 (17) |

---

IPMN-Intraductal Papillary Mucinous Neoplasm. NET- Neuro-Endocrine Tumor. IQR- Inter Quartile Range. EUS-

Endoscopic Ultra Sound. ASA- American Society of Anesthesiologists. IR- Interventional Radiology. GI- Gastro-

Intestinal. DGE- Delayed Gastric emptying. GOO- Gastric Outlet Obstruction.
